# Supplementary material for: Cooperative endocytosis of the endosomal SNARE protein syntaxin-8 and the potassium channel TASK-1
Source: PubMed Central journal article supplement — Mol Biol Cell. 2014 Jun 15;25(12):1877–91. doi: 10.1091/mbc.E13-10-0592 (PMC4055267; doi:10.1091/mbc.e13-10-0592), 2014-06-15
Supplement: supp_E13-10-0592v1_CombinedSupMats.pdf [file supp_E13-10-0592v1_CombinedSupMats.pdf]

# Supplemental Materials

*Molecular Biology of the Cell*

Renigunta et al.

## Supplementary Table 1

### Constructs used in our study

| Gene            | Xenopus Oocytes                  | Patch-clamp in CHO cells                                                    | Imaging in HeLa and CHO cells                                                 | Yeast-two-hybrid analysis | Protein Biochemistry in HeLa cells  | Antibody uptake assay in COS cells |
|-----------------|----------------------------------|-----------------------------------------------------------------------------|-------------------------------------------------------------------------------|---------------------------|-------------------------------------|------------------------------------|
| TASK-1          | N <sup>Q</sup> hTASK-1<br>-pSGEM | N <sup>Q</sup> hTASK-1<br>-pCDNA3.1<br>myc <sup>r</sup> TASK-1<br>-pCDNA3.1 | N <sup>Q</sup> hTASK-1<br>-pEGFP-C1<br>N <sup>Q</sup> hTASK-1<br>-pmCherry-C1 | TASK-1-pBT3N              | N <sup>Q</sup> hTASK-1<br>-pEGFP-C1 | rTASK-1 <sup>HA</sup><br>-pCDNA3.1 |
| TASK-3          | hTASK-3<br>-pSGEM                |                                                                             |                                                                               | TASK-3-pBT3N              |                                     |                                    |
| Syntaxin-8      | stx8<br>-pSGEM                   | myc <sup>r</sup> Stx8-<br>pCDNA3.1                                          | Stx8-pmCherry-<br>C1                                                          | Stx8-pPR3N                | myc <sup>r</sup> Stx8<br>-pCDNA3.1  | Stx8<br>-pCDNA3.1                  |
| Syntaxin-7      | stx7<br>-pSGEM                   | myc <sup>r</sup> Stx7-<br>pCDNA3.1                                          |                                                                               |                           | myc <sup>r</sup> Stx7<br>-pCDNA3.1  | Stx7<br>-pCDNA3.1                  |
| Vti1b           | vti1b-<br>pSGEM                  |                                                                             |                                                                               |                           |                                     |                                    |
| Vamp8           | vamp8-<br>pSGEM                  |                                                                             |                                                                               |                           |                                     |                                    |
| AP180C          | AP180C-<br>pSGEM                 |                                                                             |                                                                               |                           |                                     |                                    |
| 2xFYVE          |                                  |                                                                             | 2xFYVE-pEGFP                                                                  |                           |                                     |                                    |
| Rab5            |                                  |                                                                             | Rab5<br>-pDsRedMonomer                                                        |                           |                                     |                                    |
| Clathrin (LC)   |                                  |                                                                             | Clathrin-pEGFP                                                                |                           |                                     |                                    |
| ALG5            |                                  |                                                                             |                                                                               | pAI-Alg5<br>pDL2-Alg5     |                                     |                                    |
| 14-3-3 $\gamma$ |                                  |                                                                             |                                                                               | 14-3-3 $\gamma$ -pPR3N    |                                     |                                    |

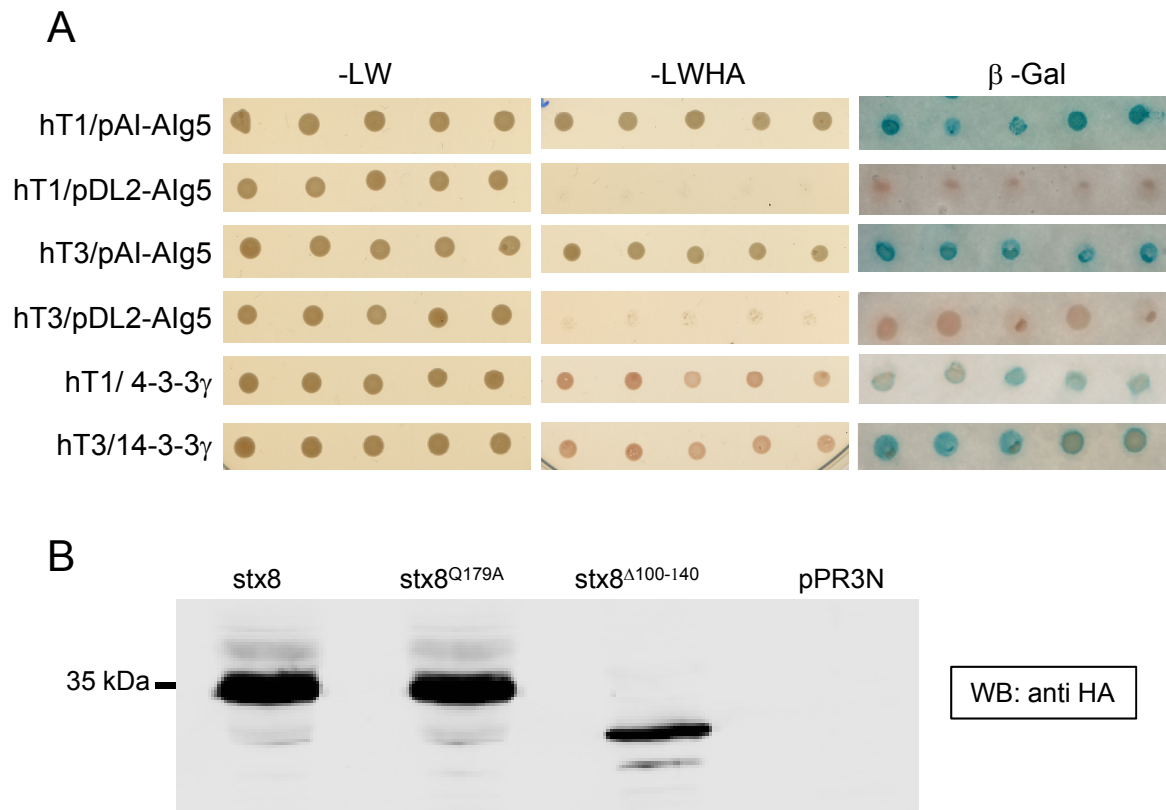

**Supplementary Figure 1.** Tests for the expression of bait and prey proteins in the NMY51 yeast strain.

(A) Membrane yeast-two-hybrid direct interaction experiments using TASK-1 or TASK-3 Cub fusion proteins as bait, and 14-3-3 $\gamma$  or Alg5 NubG-HA fusion proteins as prey. The control vectors pAI-Alg5 and pDL2-Alg5 were used as positive and negative controls, respectively (upper rows). The growth of yeast in the LWHA drop-out plates and the blue coloring on the  $\beta$ -Gal assay clearly indicate that bait proteins are expressed at the membrane. An additional control was provided by 14-3-3 $\gamma$  (lower rows). 14-3-3 $\gamma$  has been shown previously to interact with TASK-1 and TASK-3 (Rajan *et al.* J. Physiol. 2002;545:13-26). We have now also detected 14-3-3 $\gamma$  in our recent membrane yeast-two-hybrid screen of a human brain library (together with stx8). This finding further supports the correct expression of the bait proteins TASK-1 and TASK-3 in yeast.

(B) Western blot of stx8 and stx8 mutants used as prey proteins. NMY51 yeast expressing NubG-HA fusion proteins were lysed according to the manufacturer's instructions and the lysates were analyzed on SDS polyacrylamide gels. The separated proteins were blotted, probed with anti-HA antibodies (Sigma; 1:1000) and visualized with Alexa Fluor 800 secondary antibodies (LI-COR Biosciences; 1: 5000). Immunoreactivity was detected using an infrared fluorescence imaging system (Odyssey, LI-COR Biosciences). Thus, the results shown here confirm the correct expression of the bait and prey proteins in yeast.

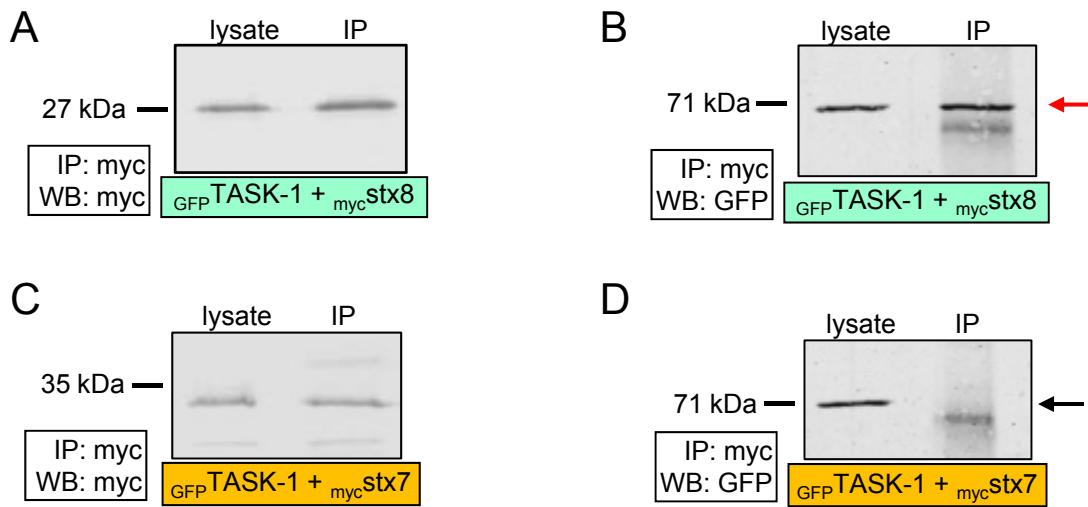

**Supplementary Figure 2.** Co-immunoprecipitation of stx8 and TASK-1 expressed in HeLa cells. (**A** and **B**) Co-IP of GFP-tagged human TASK-1 and myc-tagged and stx8. (**C** and **D**) Co-IP of GFP-tagged human TASK-1 and myc-tagged and stx7. The cell lysate was precipitated with anti-myc antibodies and the Western blot of the precipitate was probed with anti-myc (**A** and **C**) or with anti-GFP antibodies (**B** and **D**). GFP TASK-1 was co-immunoprecipitated with myc stx8 (**B**, red arrow) but not with myc stx7 (**D**, black arrow). The origin of the (unspecific) lower band seen in **C** and **D** is unknown.

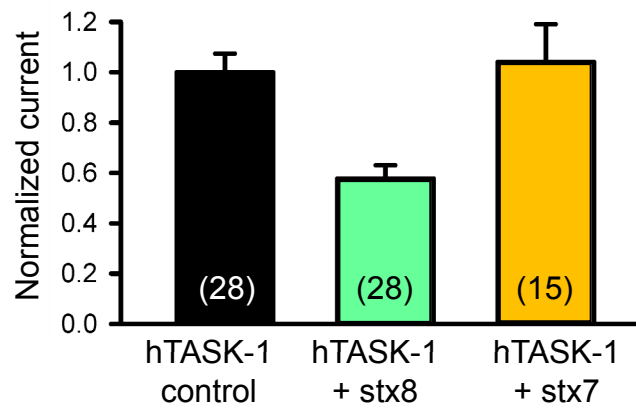

**Supplementary Figure 3.** Effects of stx8 on human TASK-1 currents expressed in CHO cells. For experiments with human TASK-1 (hTASK-1) we used the <sup>NQ</sup>TASK-1 mutant (Zuzarte *et al.*, J.Physiol. 2009;587,929-952), in which the first three amino acids at the N-terminus, MKR, were replaced by MNQ. This mutant displays a higher current amplitude due to deletion of a retention signal (KR). Co-transfection of stx8 in CHO cells had the same effect on human <sup>NQ</sup>TASK-1 channels as on wild-type rat TASK-1 channels.

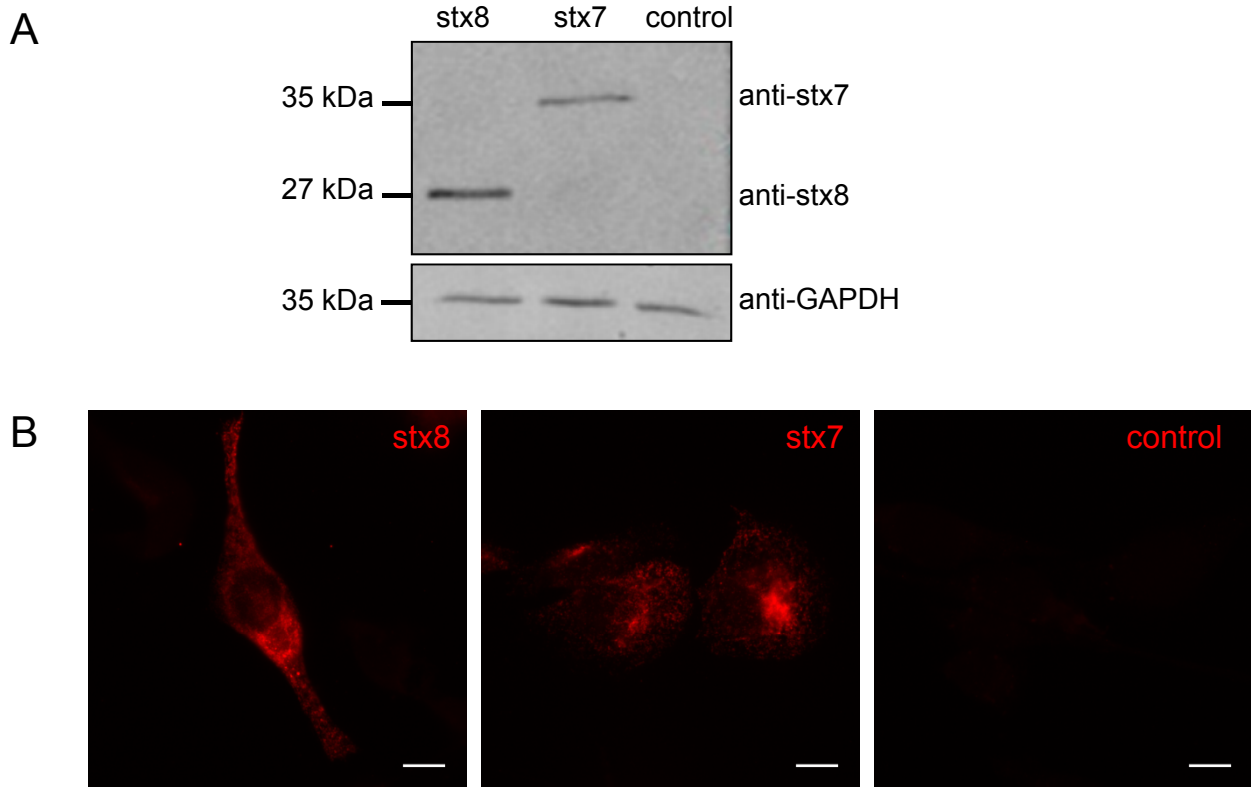

**Supplementary Figure 4.** Tests for equal expression of stx8 and stx7. CHO cells cultured in 10 cm plates were transfected with rTASK1, pEGFP-C1 and myc-tagged stx8 or stx7. 24 h later the cells were dissociated with trypsin/EDTA (Life technologies) and the samples were subdivided for use in either protein biochemistry (**A**) or immunohistochemistry experiments (**B**).

**(A)** Western Blotting. CHO cells were lysed with Triton X-100 and lysates were analyzed on SDS polyacrylamide gels. The separated proteins were probed with anti-myc (1:1000, Santa Cruz) antibodies and visualized with Alexa Fluor 800 secondary antibodies (1: 5000, LI-COR Biosciences). Immunoreactivity was detected using an infrared fluorescence imaging system (Odyssey, LI-COR Biosciences). Lysates obtained from mock-transfected CHO cells were used as negative control. GAPDH served as a loading control (lower row).

**(B)** Immunohistochemistry. CHO cells were seeded onto glass cover slips (Menzel GmbH, Saarbrücken, Germany) and fixed 24 h later with 4% PFA in PBS for 15 min at room temperature, washed three times in PBS and blocked with staining buffer (10% (v/v) goat serum (PAA), 2% (w/v) BSA (Carl Roth GmbH, Karlsruhe, Germany) and 0.01% Triton X-100 in PBS) for 1 h at RT. Subsequently, the cells were stained with mouse anti-myc antibody (Sigma Aldrich, St. Louis, US) 1:1000 in staining buffer for 60 min at room temperature, washed three times in PBS with 0.01% Triton X-100 and stained with goat anti-mouse Alexa Fluor 594 secondary antibody (Life technologies) 1:500 in staining buffer for 60 min at room temperature. After washing the cells three times in PBS with 0.01% Triton X-100 the cover slips were mounted with Mowiol 4-88 (Carl Roth GmbH) on microscope slides (Menzel GmbH). Cells were finally visualized with a Nikon Eclipse Ti microscope equipped with a 60x objective (Plan Apo VC 60x Oil DIC N2, Nikon); images were processed with NIS Elements AR 4 software (Nikon). The scale bar is 10  $\mu$ m. Panels (**A**) and (**B**) show that the expression level of stx8 and stx7 in CHO cells was similar.

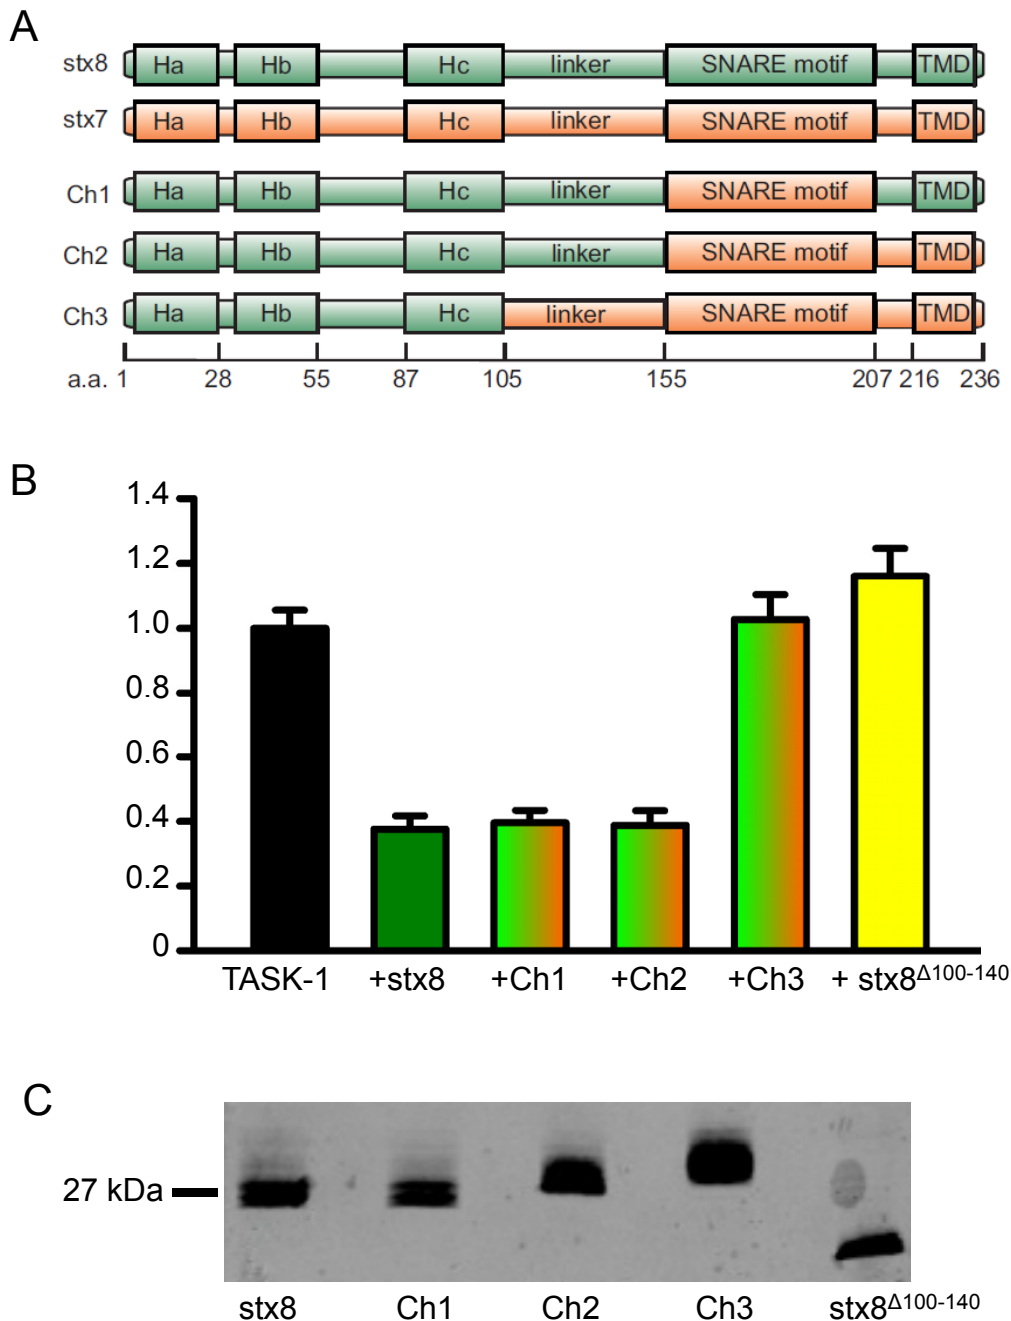

**Supplementary Figure 5.** Myc-tagged stx8 and stx8/stx7 chimeras had the same effect on TASK-1 current amplitude as un-tagged constructs.

**(A)** Topology of the stx8/stx7 chimeras (identical to Figure 3A).

**(B)** Co-expression of myc-tagged TASK-1 and myc-tagged stx8-derived constructs in *Xenopus* oocytes. The effect of co-expression of myc-stx8, myc-stx8/stx7 chimeras and the myc-stx8<sup>Δ100-140</sup> construct on TASK-1 current. Since the current amplitude varied between different batches of oocytes the currents measured after co-expression of the stx8-based constructs were normalized to the TASK-1 currents measured in the same batches of oocytes.

**(C)** Western blot of *Xenopus* oocyte lysates using an anti-myc antibody; the lysates were from the same batches of oocytes with which the current measurements were performed.

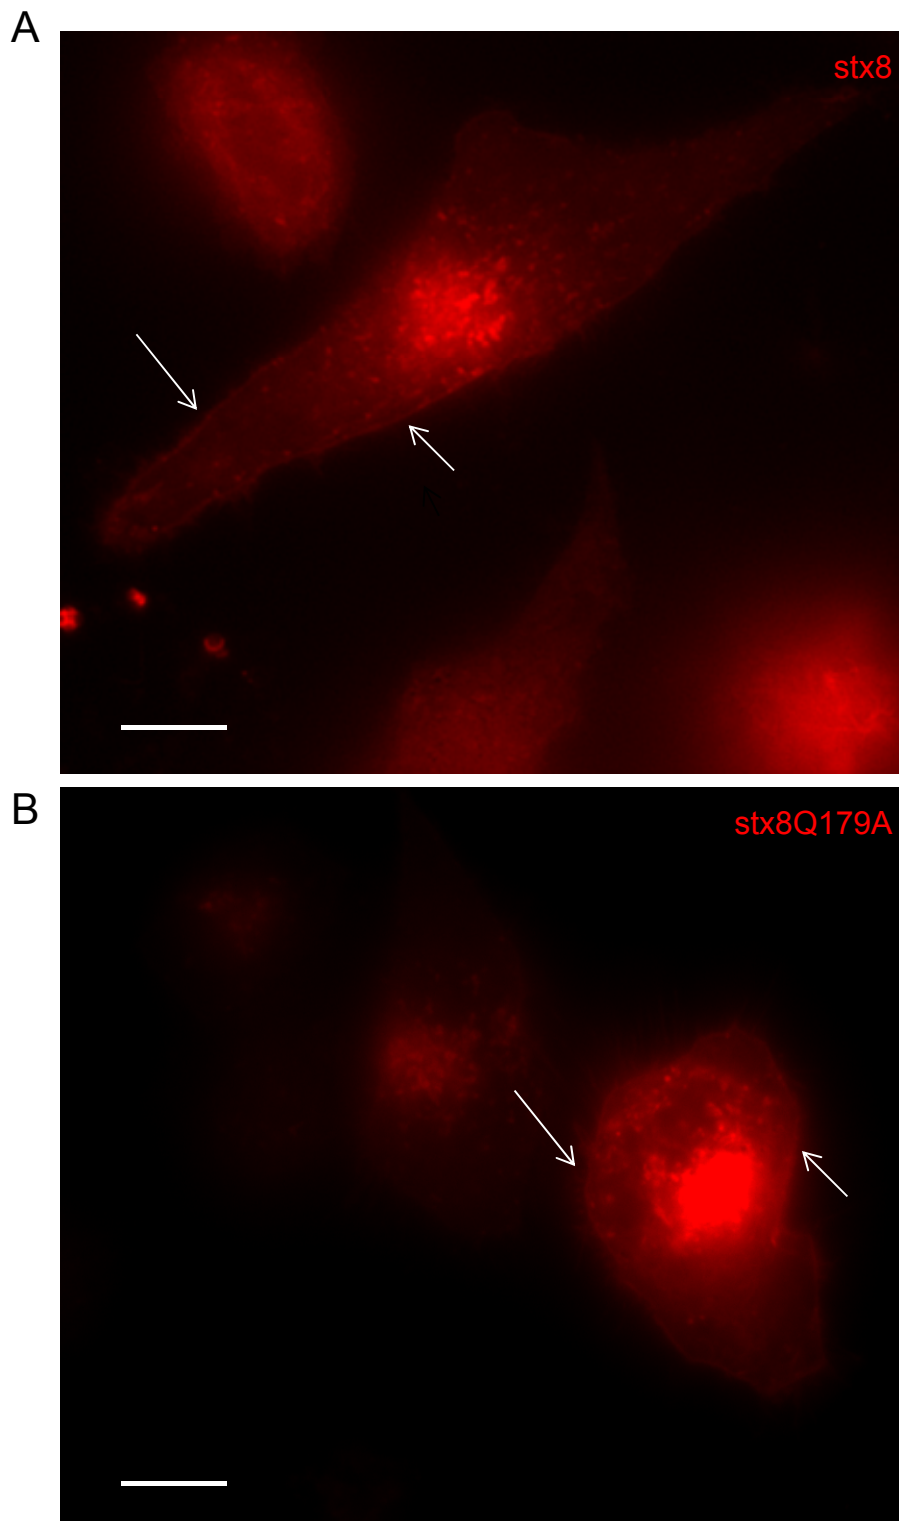

**Supplementary Figure 6.** Live-cell images of mCherry-tagged stx8 (A) and stx8Q179A (B) expressed in HeLa cells. The images were taken 48 h after transfection. The expression of the endosomal SNARE proteins in the plasma membrane can be clearly seen (arrows). Scale bars, 10  $\mu$ m.
